# Supplementary material
Source: Royal Society of Chemistry journal article supplement (doi:10.1039/d6an00094k)
Supplement: d6an00094k1.pdf [file d6an00094k1.pdf]

## Electronic Supplementary Information (ESI)

### Simple Photothermal Paper-Based Analytical Device Using Silver Nanomaterials for Quantitative Mercury Ion Monitoring in Drinking Water and Wolffia Samples

Tapparath Leelasattarathkul,<sup>1</sup> Kawin Khachornsakkul,<sup>1,2,3\*</sup> Pattarawadee Wichaiwong,<sup>2</sup>  
Wijitar Dungchai<sup>2\*</sup>

<sup>1</sup> Division of Chemistry, Department of Science, Faculty of Science and Technology,  
Rajamangala University of Technology Krungthep, Bangkok, 10120 Thailand

<sup>2</sup> Department of Chemistry, Faculty of Science, King Mongkut's University of Technology  
Thonburi, Prachautid Road, Thungkru, Bangkok, 10140, Thailand

<sup>3</sup> Department of Chemistry, Faculty of Science, Chulalongkorn University, Bangkok, 10330,  
Thailand

\*To whom correspondence should be addressed. Email: [Kawin.k@chula.ac.th](mailto:Kawin.k@chula.ac.th)

[wijitar.dun@kmutt.ac.th](mailto:wijitar.dun@kmutt.ac.th)

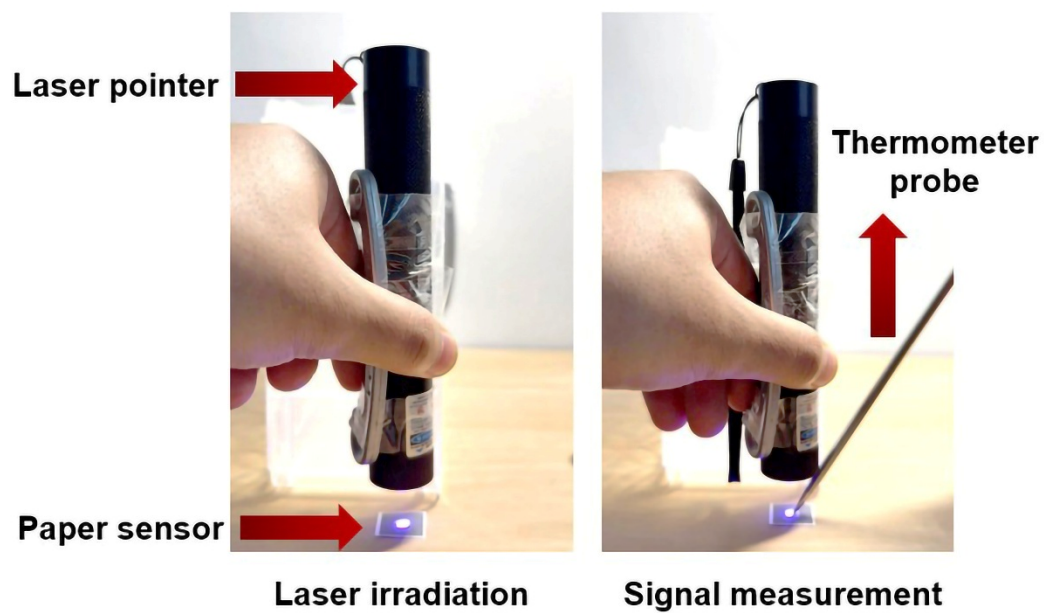

**Scheme S1** Photograph of the experimental setup of the developed PT-PAD sensor for  $\text{Hg}^{2+}$  detection in this study.

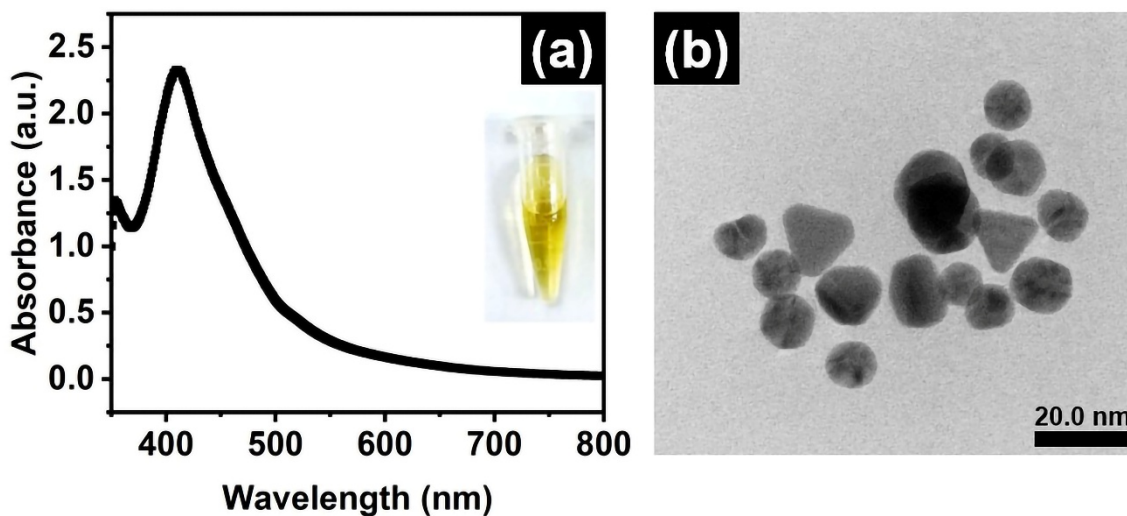

**Figure S1** (a) The absorption spectrum and (b) the TEM image of the synthesized AgNPs used in the developed PT-PAD sensor for  $\text{Hg}^{2+}$  detection in this work.

In this study, a dominant absorption peak at 410.0 nm, accompanied by a dark-yellow solution, was observed for the synthesized AgNPs, as shown in **Figure S1(a)**. Additionally, in **Figure S1(b)**, the TEM image displayed the particles with a size of  $8.0 \pm 2.0$  nm. These results thus demonstrate the successful synthesis of AgNPs using the developed technique.

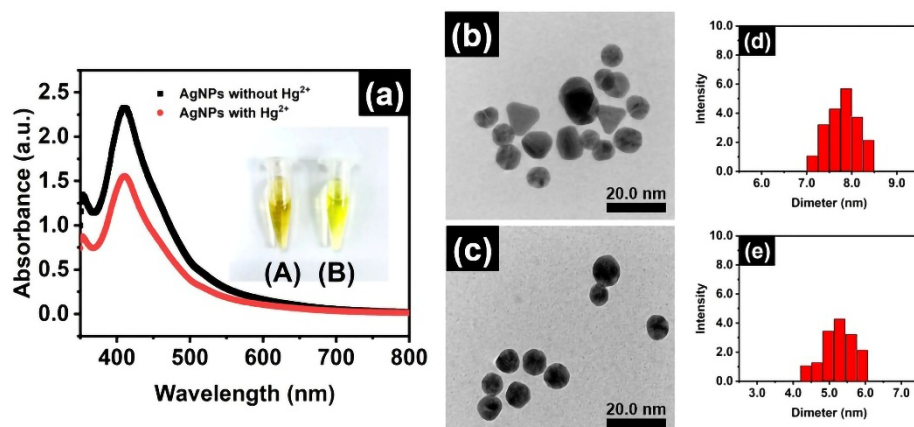

**Figure S2** (a) The absorption spectrum of the synthesized AgNPs (black line) and the synthesized AgNPs with addition of  $Hg^{2+}$  at 6.0 ppb (red line). The inserted images indicate the synthesized AgNPs in the absent (A) and present (B) of  $Hg^{2+}$ . The TEM image of the synthesized AgNPs in the absent (b) and present (c) of  $Hg^{2+}$ . The DLS measurement of the synthesized AgNPs in the absent (d) and present (e) of  $Hg^{2+}$ .

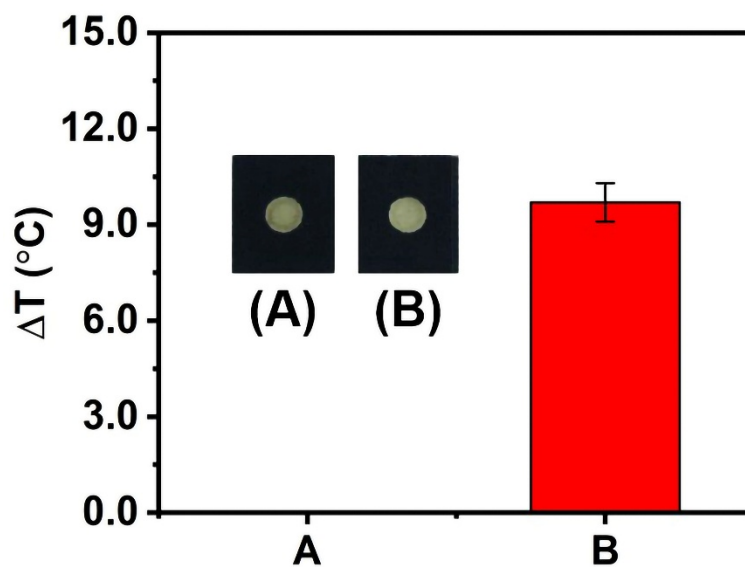

**Figure S3** Demonstrates the  $\Delta T$  signals of the detection of (A) blank solution and (B)  $\text{Hg}^{2+}$  at 6.0 ppb using the PT-PAD sensor ( $n = 3$ ).

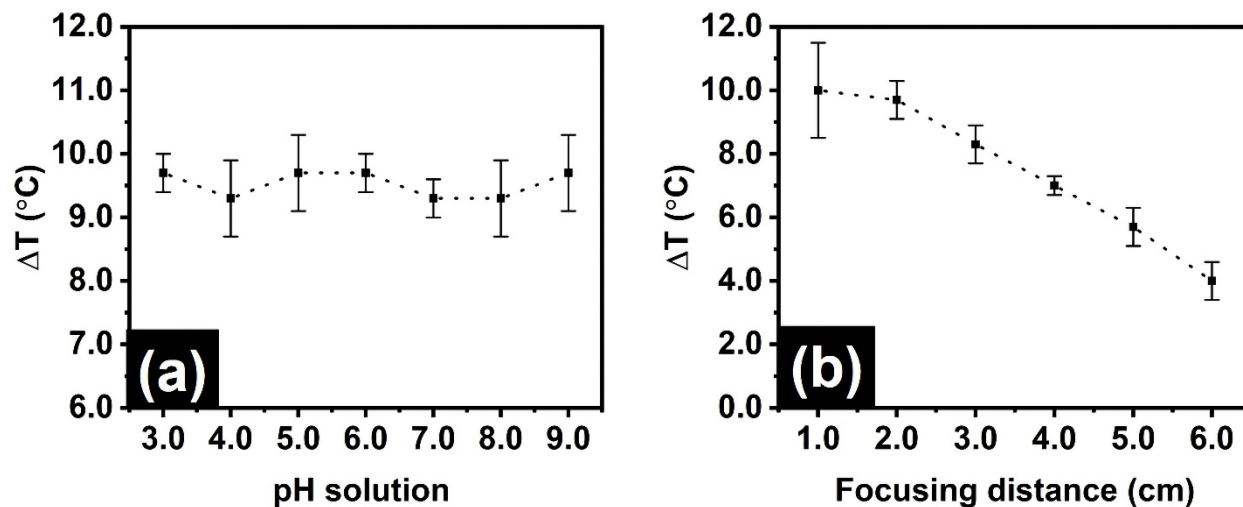

**Figure S4** Demonstrates the  $\Delta T$  signals of the (a) pH solution and (b) focusing distance between laser and PAD sensor for the detection of  $\text{Hg}^{2+}$  using the developed PT-PAD sensor ( $n = 3$ ).

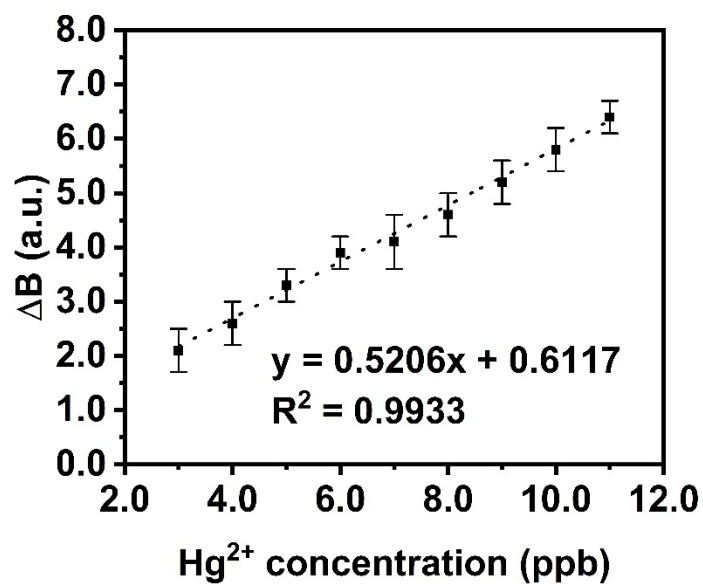

**Figure S5** The linear range of the  $\text{Hg}^{2+}$  quantification using the proposed method with the colorimetric detection ( $n = 3$ ).

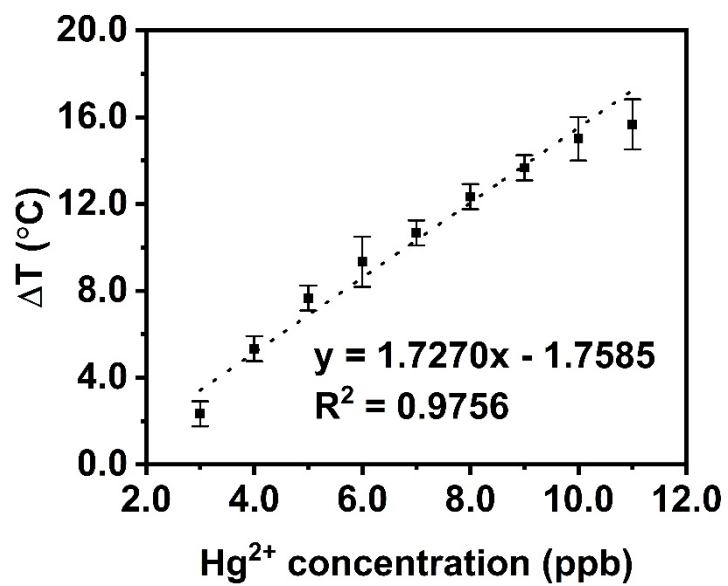

**Figure S6** Demonstrates the  $\Delta T$  signal for linear working range of  $\text{Hg}^{2+}$  detection with non-logarithm scale in analyte concentration ( $n = 3$ ).

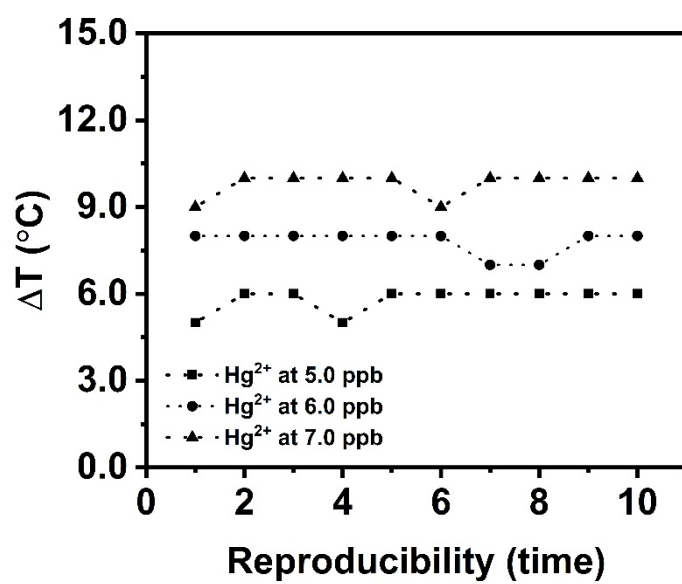

**Figure S7** Demonstrates the  $\Delta T$  signals of the reproducibility of the proposed method for the detection of  $\text{Hg}^{2+}$  at (■) 5.0, (●) 6.0, and (▲) 7.0 ppb.

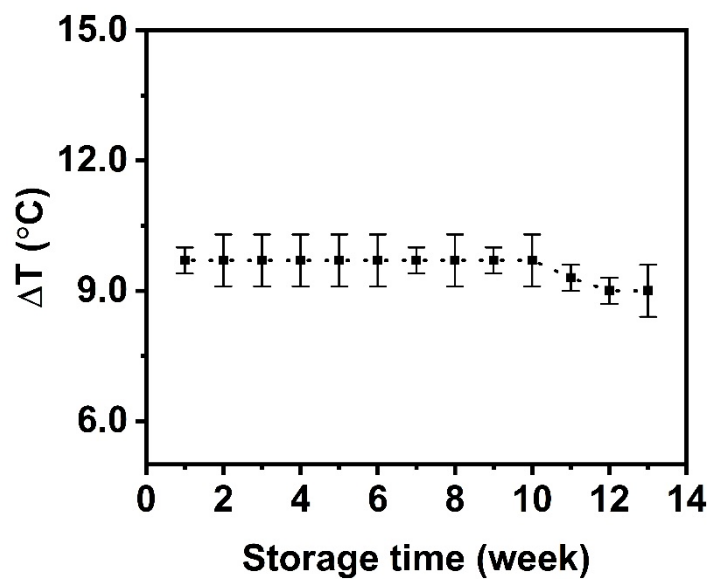

**Figure S8** Demonstrates the  $\Delta T$  signals of storage time evaluation of the developed PT-PAD sensor for  $\text{Hg}^{2+}$  detection at 6.0 ppb ( $n = 3$ ).
